# Supplementary material for: Regulated Phosphorylation of a Major UDP-glucuronosyltransferase Isozyme by Tyrosine Kinases Dictates Endogenous Substrate Selection for Detoxification
Source: PubMed Central journal article supplement — J Biol Chem. 2010 Nov 5;286(2):1639–48. doi: 10.1074/jbc.M110.165126 (PMC3020772; doi:10.1074/jbc.m110.165126), 2010-11-05

**Supplemental material for:** Regulated phosphorylation of a major UDP-glucuronosyltransferase isozyme by tyrosine kinases dictates endogenous substrate-selection for detoxification

### **Legend**

**Fig. S1 Effect of curcumin and cycloheximide on UGT2B7 activity with time.**

Seventy hours after 2B7 transfection of COS-1 cells as described under Methods, cells were changed to fresh medium containing curcumin and/or cycloheximide as shown for 24 h. Cells were harvested and assayed using 4-OHE<sub>1</sub>.

**Fig. S2 Western Blot Analysis of Fgr Kinase in SYF Cells.** Cells, transfected with vector- or 2B7 that incubated for 72 hr, were harvested, and aliquots of corresponding homogenates were resolved in a 4-15 % gradient gel, transblotted and processed for Western blot analysis using the Fgr and  $\beta$ -actin antibody preparations as shown.

## Effect of Curcumin and Cycloheximide on UGT2B7 with time

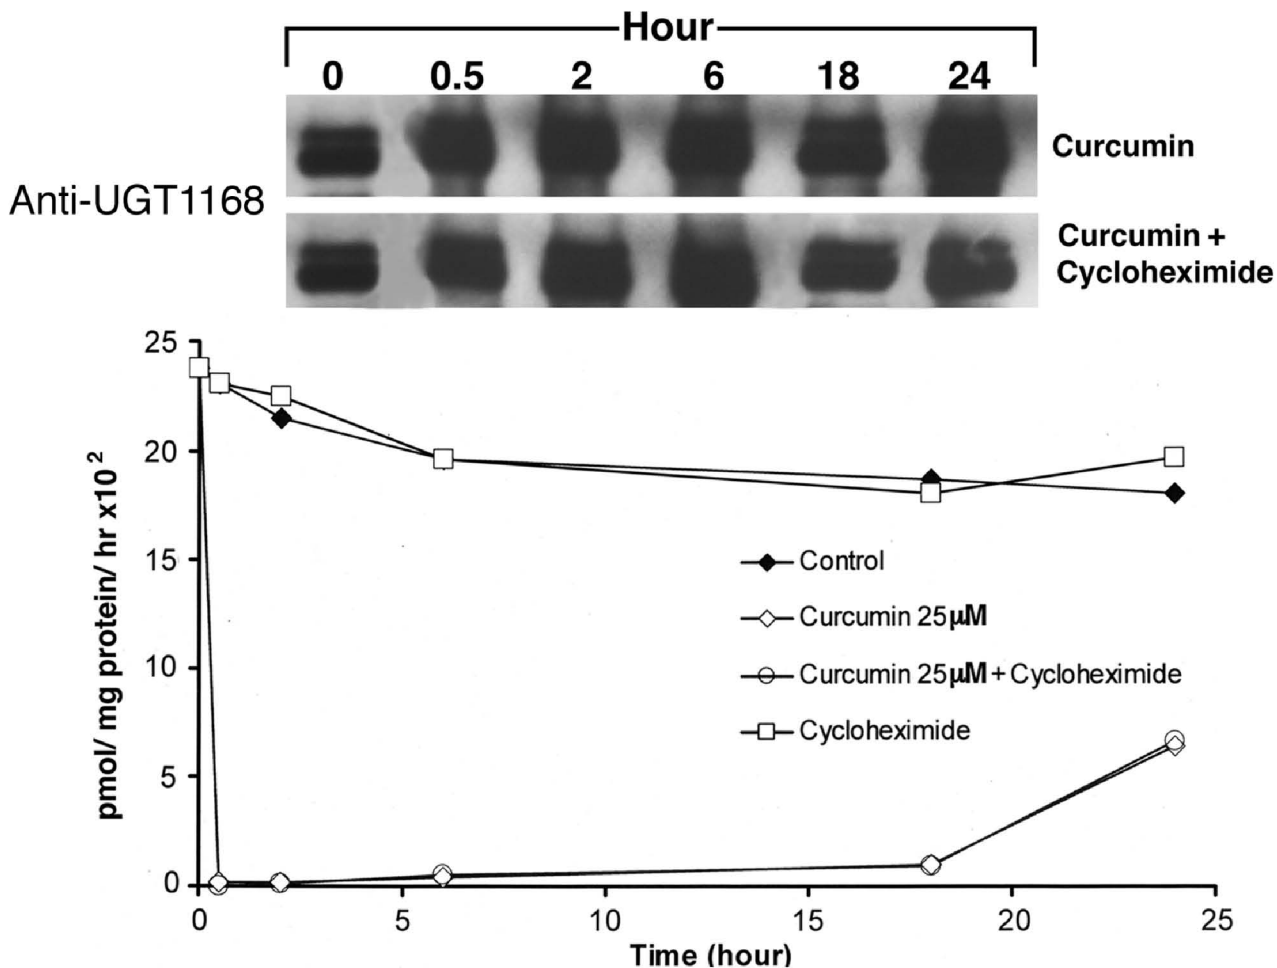

**Figure S2**

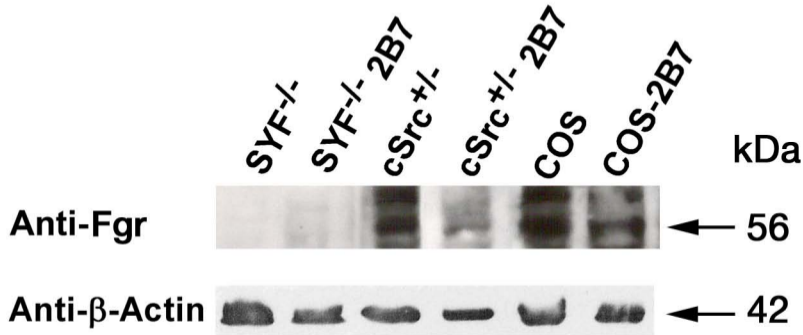

Supplement: supp_M110.165126_jbc.M110.165126-1.pdf [file supp_M110.165126_jbc.M110.165126-1.pdf]
